# Supplementary material for: One novel complex obtained through copper-mediated conversion of 2,5-bis(3-pyridyl)-1,3,4-oxadiazole: structure, in situ formation of ligand, and luminescence properties
Source: Royal Society of Chemistry journal article supplement (doi:10.1039/c1ce05440f), 2011-01-01
Supplement: c1ce05440f.pdf [file c1ce05440f.pdf]

# One novel complex obtained through copper-mediated conversion of 2,5-bis(3-pyridyl)-1,3,4-oxadiazole: structure, in situ formation of ligand, and luminescence property

Zhen-Lan Fang,<sup>a</sup> Jian-Gang He,<sup>a</sup> Rong-Min Yu,<sup>a</sup> Xiao-Yuan Wu<sup>a</sup> and Can-Zhong Lu<sup>\*a</sup>

## Figure Captions.

**Fig. S1** Optical absorption spectra of complex 1 (inset: the optical gap of 1).

**Fig. S2** XRPD patterns of simulated from a single crystal of 1 (dark), [as-synthesized sample](#) of 1 (red).

**Fig. S3** FT-IR spectroscopic characterizations for 1.

**Fig. S4** TGA profiles for 1.

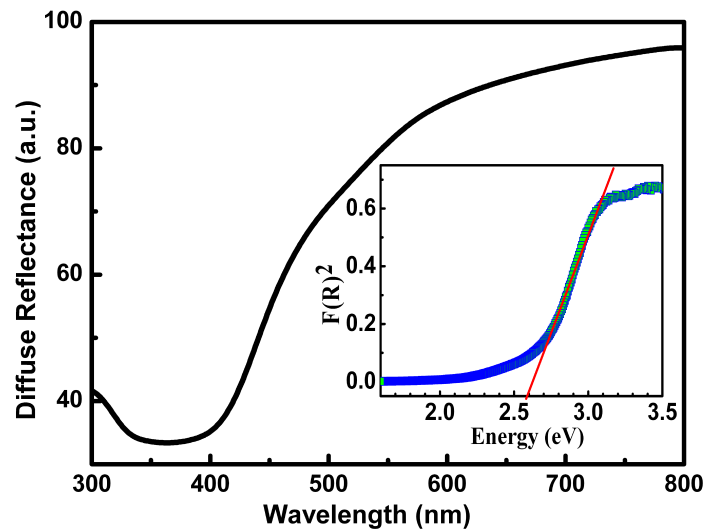

Fig. S1 Optical absorption spectra of complex 1 (inset: the optical gap 1).

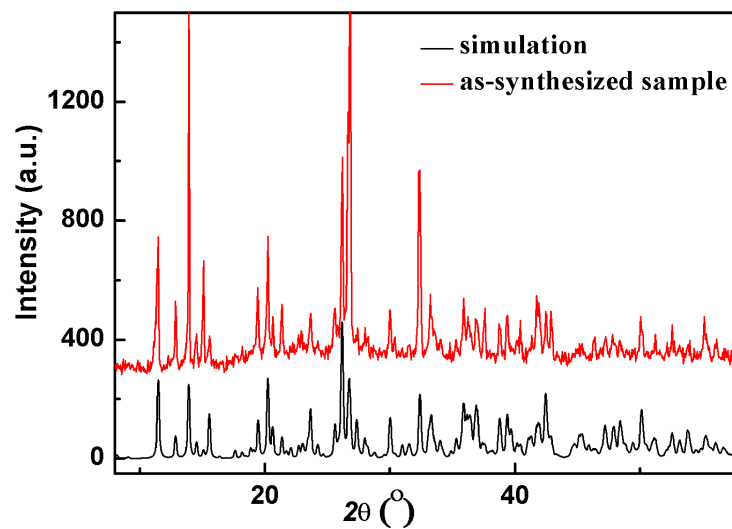

Fig. S2 XRPD patterns of simulated from a single crystal of 1 (dark), [as-synthesized sample](#) of 1 (red).

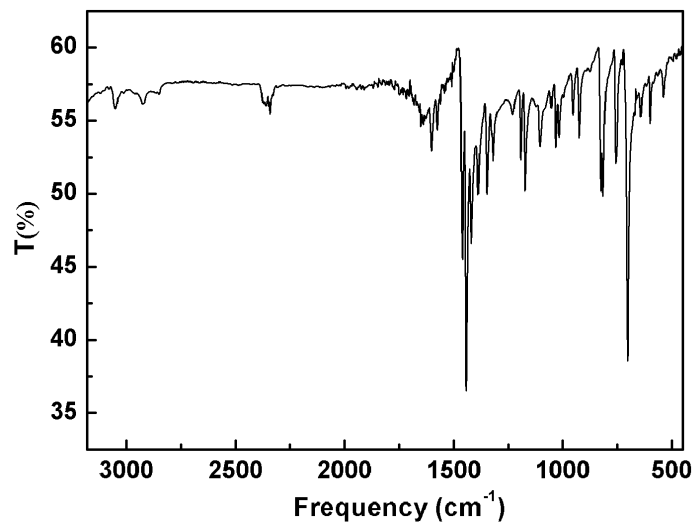

Fig. S3 FT-IR spectroscopic characterizations for 1.

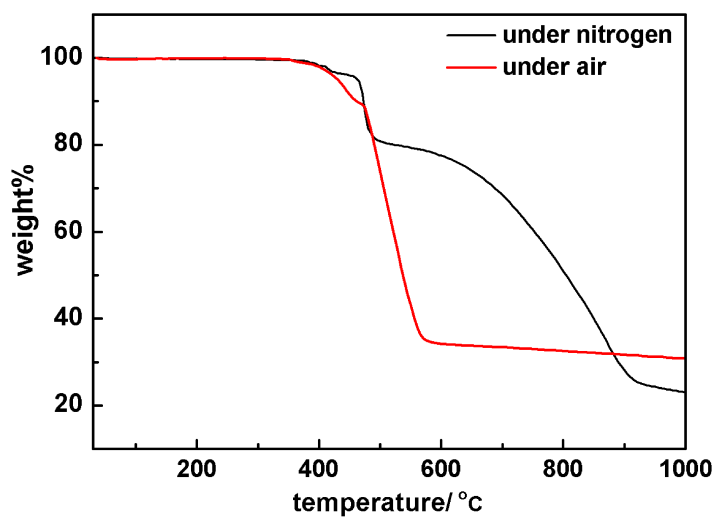

Fig. S4 TGA profiles for 1.
